# Supplementary material for: Color stability and spectroscopic properties of deoxyvitisins in aqueous solution
Source: Royal Society of Chemistry journal article supplement (doi:10.1039/c3nj01271a), 2013-11-12
Supplement: c3nj01271a.pdf [file c3nj01271a.pdf]

## Supplementary Material

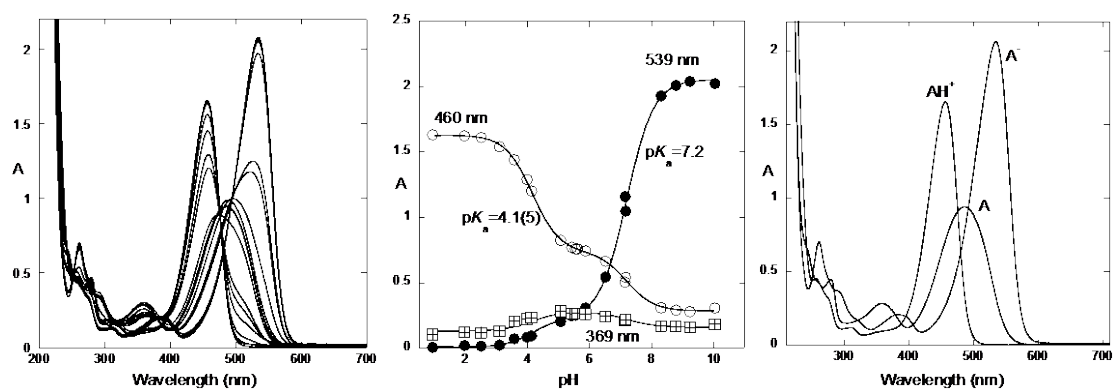

**Figure S1.** A- pH dependent absorption spectra of 4',7-dihydroxyflavylium; B- Titration curves; fitting was achieved for  $pK_{a1}=4.15$  and  $pK_{a2}=7.2$ ; C- Absorption spectra of the three species obtained by mathematical decomposition
